# Supplementary material for: Comparison of clinical utilities of the platelet count and platelet-lymphocyte ratio for predicting survival in patients with cervical cancer: a single institutional study and literature review
Source: PubMed Central journal article supplement (PMC5589667; doi:10.18632/oncotarget.19560), 2017-07-25
Supplement: oncotarget-08-55394-s001.pdf [file oncotarget-08-55394-s001.pdf]

# Comparison of clinical utilities of the platelet count and platelet-lymphocyte ratio for predicting survival in patients with cervical cancer: a single institutional study and literature review

## SUPPLEMENTARY MATERIALS

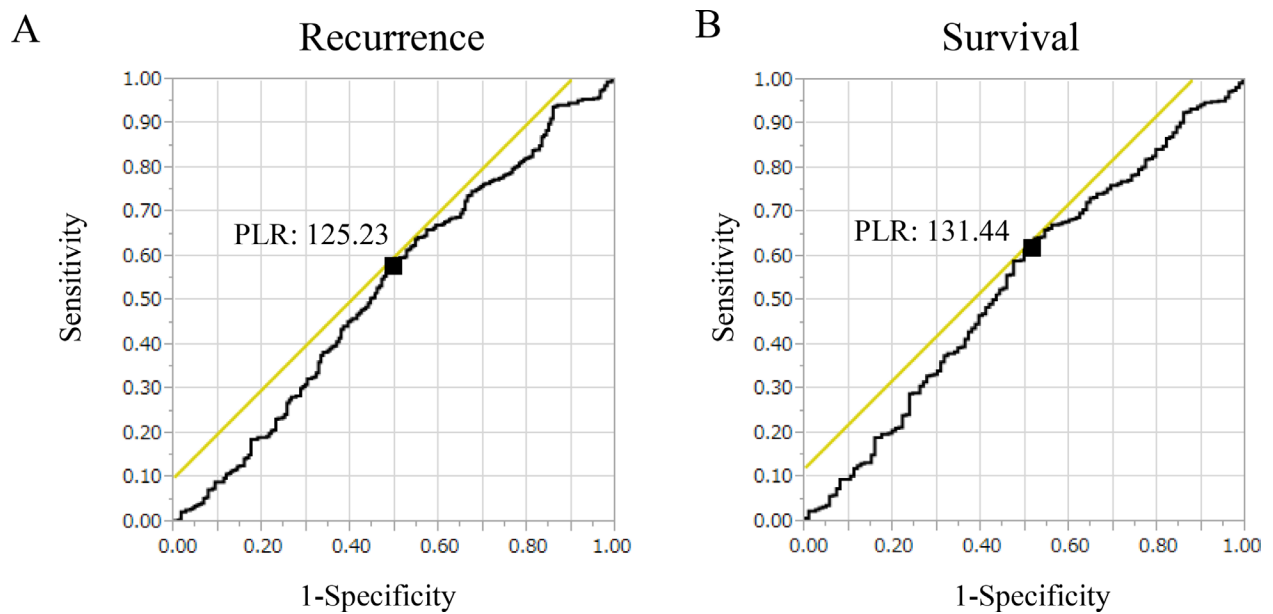

Supplementary Figure 1: ROC curves for (A) recurrence and (B) survival at 3 years.

**Supplementary Table 1: Clinicopathological characteristics of patients according to PLR <sup>1</sup>**

|                        |           | All patients |      | Elevated PLR |      | Normal PLR |      | <i>p</i> -value |
|------------------------|-----------|--------------|------|--------------|------|------------|------|-----------------|
|                        |           | No           | (%)  | No           | (%)  | No         | (%)  |                 |
| Age                    | < 50      | 268          | 39.2 | 135          | 50.4 | 133        | 49.6 | 0.0059          |
|                        | ≥ 50      | 416          | 60.8 | 165          | 39.7 | 251        | 60.3 |                 |
| Stage                  | I-IIA     | 378          | 55.3 | 150          | 39.7 | 228        | 60.3 | 0.014           |
|                        | IIB-IVB   | 306          | 44.7 | 150          | 49.0 | 156        | 51.0 |                 |
| Histology              | SCC       | 511          | 74.7 | 221          | 43.2 | 290        | 56.8 | 0.58            |
|                        | Non-SCC   | 173          | 25.3 | 79           | 45.7 | 94         | 54.3 |                 |
| Pelvic node metastasis | Negative  | 517          | 75.6 | 233          | 45.1 | 284        | 54.9 | 0.26            |
|                        | Positive  | 167          | 24.4 | 67           | 40.1 | 100        | 59.9 |                 |
| Tumor size (mm)        | < 40      | 328          | 48.0 | 137          | 41.8 | 191        | 58.2 | 0.29            |
|                        | ≥ 40      | 356          | 52.0 | 163          | 45.8 | 193        | 54.2 |                 |
| Treatment              | Surgery   | 395          | 57.7 | 171          | 43.3 | 224        | 56.7 | 0.73            |
|                        | Others 2  | 289          | 42.3 | 129          | 44.6 | 160        | 55.4 |                 |
| Platelet count (/μl)   | < 350,000 | 597          | 87.3 | 231          | 38.7 | 366        | 61.3 | < 0.001         |
|                        | ≥ 350,000 | 87           | 12.7 | 69           | 79.3 | 18         | 20.7 |                 |
| Total                  |           | 684          | 100  | 300          | 43.9 | 384        | 56.1 |                 |

SCC, squamous cell carcinoma; PLR, platelet-lymphocyte ratio.

<sup>1</sup>A PLR cut-off value of 125.23 was employed in this analysis.

<sup>2</sup>Concurrent chemoradiotherapy, radiotherapy and chemotherapy.

**Supplementary Table 2: Treatment outcomes according to the risk classification**

|                                     | Cut-off value of PLR employed | Low-risk group  | Intermediate-risk group | High-risk group | <i>p</i> -value |
|-------------------------------------|-------------------------------|-----------------|-------------------------|-----------------|-----------------|
| 3-year recurrence rate, % (N/Total) | 125.23                        | 25.5% (89/349 ) | 33.2% (73/220 )         | 44.0% (37/84 )  | 0.0023          |
| 3-year death rate, % (N/Total)      | 131.44                        | 15.7% (60/383 ) | 21.0% (39/186)          | 35.3% (30/85 )  | < 0.001         |

PLR, platelet-lymphocyte ratio.
